# Supplementary material
Source: Springer Nature journal article supplement (https://www.springermedizin.de/resource/supplementary/13075_2013_4209_MOESM6_ESM.pdf/9696324)

COL2A1- *m/z* 1679.8  
DGTEGAAGPPGPSGPAGER

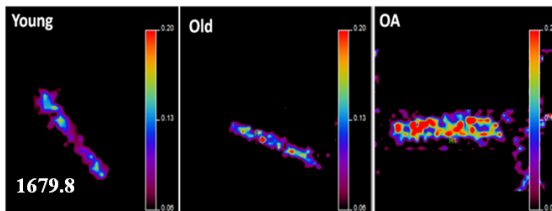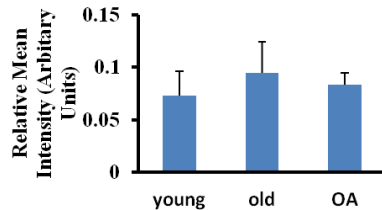

COMP- *m/z* 2256.1  
FYEGPELVADSNVVLDTTMR

P=0.04

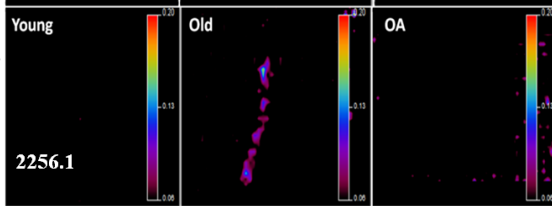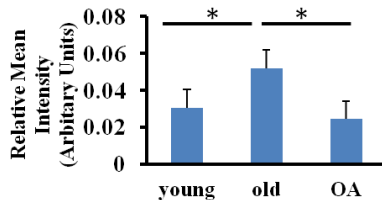

Biglycan- *m/z* 2027.2  
NHLVEIPPNLPSLVELR

P=0.02

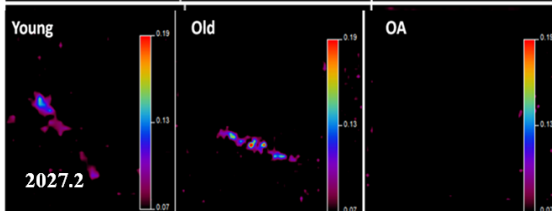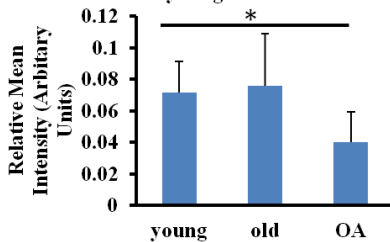

Supplement: MOESM6 [file 9696324]
